# Supplementary material
Source: Springer Nature journal article supplement (https://www.springermedizin.de/resource/supplementary/12916_2012_702_MOESM3_ESM.pdf/9598608)

### Honesty

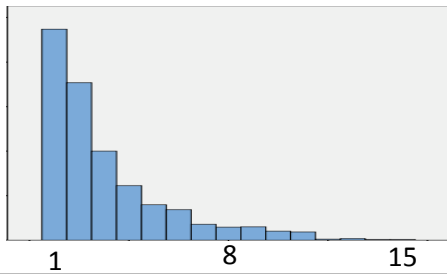

### Respect

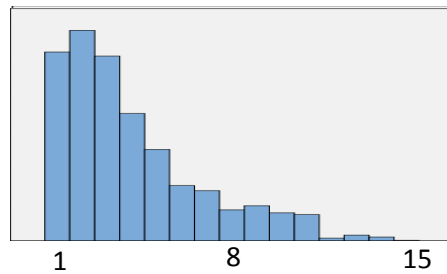

### Veracity

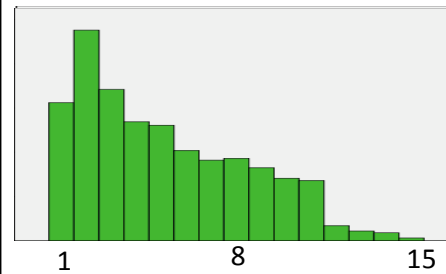

### Will to Serve

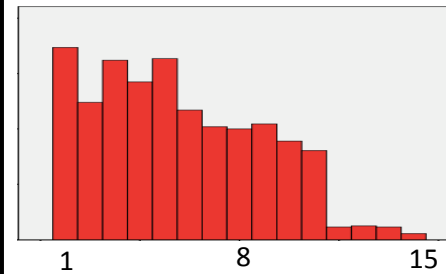

### Equality

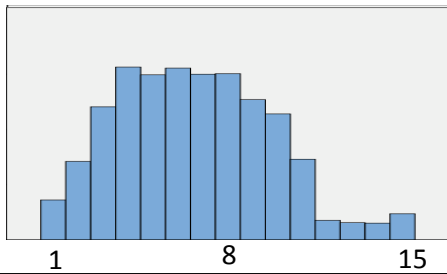

### Justice

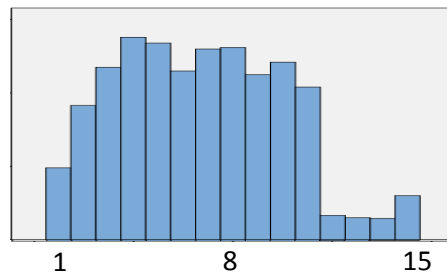

### Tolerance

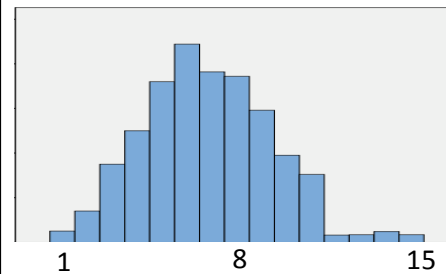

### Love

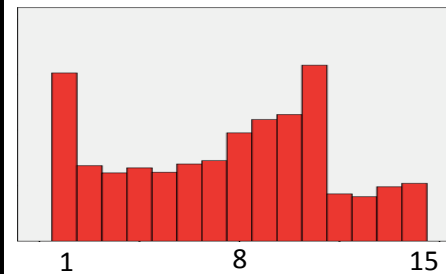

### Liberty

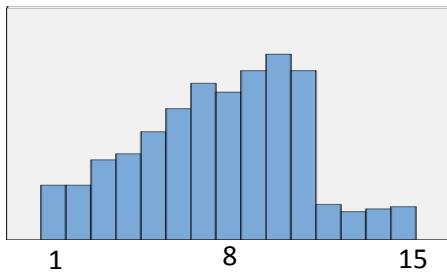

### Interest

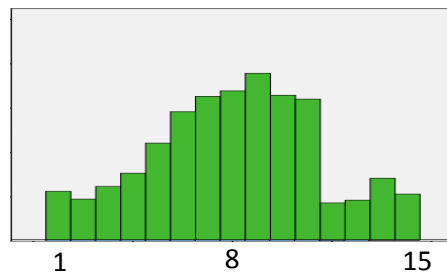

### Autonomy

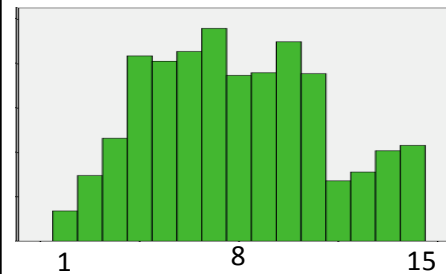

### Charity

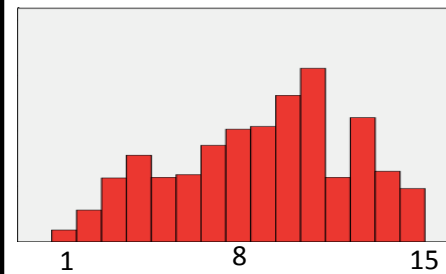

### Fidelity

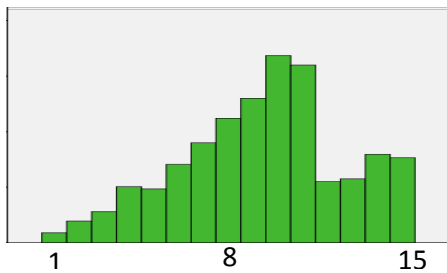

### Purity

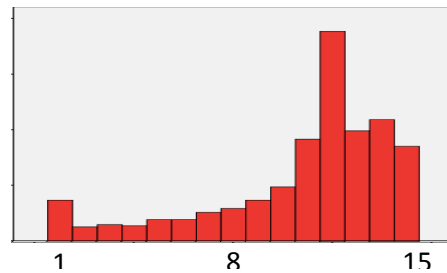

### Beauty

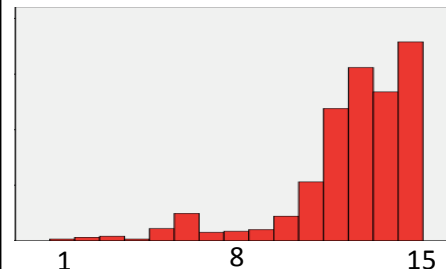

Supplement: MOESM3 [file 9598608]
